# Supplementary material
Source: publisher figshare collection journal article supplement (https://karger.figshare.com/ndownloader/files/12534662)
Supplement: Supplementary file 1 [file 12534662]

**Table S1. Bivariable analysis of the predictors of early National Institute of Health Stroke Scale improvement**

| Total N=209                       |                                 | delta NIHSS score < 4 points<br>n=130 | delta NIHSS score ≥ 4 points<br>n=79 | Crude Odds Ratios (95%CI) | P-values     |
|-----------------------------------|---------------------------------|---------------------------------------|--------------------------------------|---------------------------|--------------|
| <b>Positioning</b>                |                                 |                                       |                                      |                           |              |
|                                   | n-TP                            | 81 (62.3)                             | 38 (48.1)                            | 1                         |              |
|                                   | TP                              | 49 (37.7)                             | 41 (51.9)                            | 1.78 (1.01-3.14)          | <b>0.045</b> |
| <b>Age</b>                        |                                 |                                       |                                      |                           |              |
|                                   | 31 to 65 years                  | 32 (24.6)                             | 24 (30.4)                            | 1                         |              |
|                                   | 66 to 75 years                  | 30 (23.1)                             | 20 (25.3)                            | 0.89 (0.40-1.93)          | 0.766        |
|                                   | 76 to 85 years                  | 36 (27.7)                             | 18 (22.8)                            | 0.67 (0.30-1.45)          | 0.305        |
|                                   | 86 to 94 years                  | 32 (24.6)                             | 17 (21.5)                            | 0.70 (0.32-1.56)          | 0.393        |
| <b>Gender</b>                     |                                 |                                       |                                      |                           |              |
|                                   | Female                          | 71 (54.6)                             | 35 (44.3)                            | 1                         |              |
|                                   | Male                            | 59 (45.4)                             | 44 (55.7)                            | 1.51 (0.86-2.65)          | 0.149        |
| <b>Diabetes mellitus</b>          |                                 |                                       |                                      |                           |              |
|                                   | No                              | 109 (81.5)                            | 70 (88.6)                            | 1                         |              |
|                                   | Yes                             | 24 (18.5)                             | 9 (11.4)                             | 1.76 (0.77-4.01)          | 0.178        |
| <b>Heart rate</b>                 |                                 |                                       |                                      |                           |              |
|                                   | 43 to 70 ppm                    | 41 (31.5)                             | 35 (44.3)                            | 1.73 (0.96-3.08)          | 0.064        |
|                                   | 71 to 140 ppm                   | 89 (68.5)                             | 44 (55.7)                            | 1                         |              |
| <b>Mean arterial BP</b>           |                                 |                                       |                                      |                           |              |
|                                   | 59 to 103 mmHg                  | 57 (43.8)                             | 44 (55.7)                            | 1.61 (0.91-2.82)          | 0.097        |
|                                   | 104 to 180 mmHg                 | 73 (56.2)                             | 35 (44.3)                            | 1                         |              |
| <b>Haemoglobine rate</b>          |                                 |                                       |                                      |                           |              |
|                                   | 8.7 to 14.0 g.dL <sup>-1</sup>  | 75 (57.7)                             | 32 (40.5)                            | 1                         | <b>0.017</b> |
|                                   | 14.1 to 18.6 g.dL <sup>-1</sup> | 55 (42.3)                             | 47 (59.5)                            | 2.00 (1.13-3.53)          |              |
| <b>Collateral vessel network</b>  |                                 |                                       |                                      |                           |              |
|                                   | "Poor"                          | 46 (35.4)                             | 31 (39.2)                            | 1                         |              |
|                                   | "Good"                          | 84 (64.6)                             | 48 (60.8)                            | 0.85 (0.47-1.51)          | 0.575        |
| <b>Thrombolysis with IV rt-PA</b> |                                 |                                       |                                      |                           |              |
|                                   | No                              | 67 (51.5)                             | 32 (40.5)                            | 1                         |              |
|                                   | Yes                             | 63 (48.5)                             | 47 (59.5)                            | 1.56 (0.88-2.75)          | 0.122        |
| <b>Recanalization</b>             |                                 |                                       |                                      |                           |              |
|                                   | Non effective                   | 54 (41.5)                             | 20 (25.3)                            | 1                         |              |
|                                   | Effective                       | 28 (21.5)                             | 31 (39.2)                            | 2.99 (1.44-6.17)          | <b>0.003</b> |
|                                   | Missing                         | 48 (36.9)                             | 28 (35.4)                            | 1.57 (0.78-3.15)          | 0.199        |

TP: Trendelenburg Positioning ; nTP: non-Trendelenburg Positioning

NIHSS: National Institute of Health Stroke Scale

BP: blood pressure ; IV rt-PA : intravenous recombinant tissue plasminogen activator

Data are numbers and percentages (brackets), crude (unadjusted) odds ratios and 95% confidence intervals

**Table S2. Multiple logistic regression models of the predictors of early National Institute of Health Stroke Scale improvement according to the level of NIHSS admission score**

|                                   |               | delta NIHSS score < 4 points | delta NIHSS score >= 4 points | Adjusted Odds Ratios (95%CI) | P-values     |
|-----------------------------------|---------------|------------------------------|-------------------------------|------------------------------|--------------|
| Admission NIHSS score <=12, n=105 |               | n=76                         | n=29                          |                              |              |
| <b>Positioning</b>                |               |                              |                               |                              |              |
|                                   | n-TP          | 49 (64.5)                    | 13 (44.8)                     | 1                            |              |
|                                   | TP            | 27 (35.5)                    | 16 (55.2)                     | 2.95 (1.07-8.11)             | <b>0.036</b> |
| <b>Gender</b>                     |               |                              |                               |                              |              |
|                                   | Female        | 47 (61.8)                    | 11 (37.9)                     | 1                            |              |
|                                   | Male          | 29 (38.2)                    | 18 (62.1)                     | 3.02 (1.13-8.02)             | <b>0.026</b> |
| <b>Thrombolysis with IV rt-PA</b> |               |                              |                               |                              |              |
|                                   | No            | 50 (65.8)                    | 11 (37.9)                     | 1                            |              |
|                                   | Yes           | 26 (34.2)                    | 18 (62.1)                     | 2.90 (1.00-8.39)             | <b>0.049</b> |
| <b>Recanalization</b>             |               |                              |                               |                              |              |
|                                   | Non effective | 32 (42.1)                    | 5 (17.2)                      | 1                            |              |
|                                   | Effective     | 18 (23.7)                    | 13 (44.8)                     | 2.75 (0.75-10.05)            | 0.126        |
|                                   | Missing       | 26 (34.2)                    | 11 (37.9)                     | 3.83 (1.04-14.11)            | <b>0.043</b> |
| <hr/>                             |               |                              |                               |                              |              |
|                                   |               | delta NIHSS score < 4 points | delta NIHSS score >= 4 points | Adjusted Odds Ratios (95%CI) | P-values     |
| Admission NIHSS score >12, n=104  |               | n=54                         | n=50                          |                              |              |
| <b>Positioning</b>                |               |                              |                               |                              |              |
|                                   | n-TP          | 32 (59.3)                    | 25 (50.0)                     | 1                            |              |
|                                   | TP            | 22 (40.7)                    | 25 (50.0)                     | 1.57 (0.69-3.53)             | 0.277        |
| <b>Gender</b>                     |               |                              |                               |                              |              |
|                                   | Female        | 24 (44.4)                    | 24 (48.0)                     | 1                            |              |
|                                   | Male          | 30 (55.6)                    | 26 (52.0)                     | 0.85 (0.37-1.91)             | 0.687        |
| <b>Thrombolysis with IV rt-PA</b> |               |                              |                               |                              |              |
|                                   | No            | 17 (31.5)                    | 21 (42.0)                     | 1                            |              |
|                                   | Yes           | 37 (68.5)                    | 29 (58.0)                     | 0.48 (0.19-1.18)             | 0.110        |
| <b>Recanalization</b>             |               |                              |                               |                              |              |
|                                   | Non effective | 22 (40.7)                    | 15 (30.0)                     | 1                            |              |
|                                   | Effective     | 10 (18.5)                    | 18 (36.0)                     | 3.07 (1.07-8.74)             | <b>0.036</b> |
|                                   | Missing       | 22 (40.7)                    | 17 (34.0)                     | 0.95 (0.36-2.50)             | 0.919        |

TP: Trendelenburg Positioning ; nTP: non-Trendelenburg Positioning

NIHSS: National Institute of Health Stroke Scale

IV rt-PA : intravenous recombinant tissue plasminogen activator

Data are numbers and percentages (brackets), adjusted odds ratios and 95% confidence intervals

**Table S3. Multiple logistic regression models of the predictors of early National Institute of Health Stroke Scale improvement according to the gender**

|                            | delta NIHSS score < 4 points<br>n=71 | delta NIHSS score >= 4 points<br>n=35 | Adjusted Odds Ratios (95%CI) | P-values     |
|----------------------------|--------------------------------------|---------------------------------------|------------------------------|--------------|
| <b>Women, n=106</b>        |                                      |                                       |                              |              |
| Positioning                |                                      |                                       |                              |              |
| n-TP                       | 43 (60.6)                            | 18 (51.4)                             | 1                            |              |
| TP                         | 28 (39.4)                            | 17 (48.6)                             | 1.41 (0.57-3.43)             | 0.452        |
| Collateral vessel network  |                                      |                                       |                              |              |
| "Poor"                     | 22 (31.0)                            | 13 (37.1)                             | 1                            |              |
| "Good"                     | 49 (69.0)                            | 22 (62.9)                             | 0.81 (0.32-2.03)             | 0.648        |
| Thrombolysis with IV rt-PA |                                      |                                       |                              |              |
| No                         | 42 (59.1)                            | 14 (40.0)                             | 1                            |              |
| Yes                        | 29 (40.9)                            | 21 (60.0)                             | 1.20 (0.42-3.43)             | 0.725        |
| Recanalization             |                                      |                                       |                              |              |
| Non effective              | 30 (42.2)                            | 8 (22.9)                              | 1                            |              |
| Effective                  | 10 (14.1)                            | 17 (48.6)                             | 5.95 (1.87-18.90)            | <b>0.002</b> |
| Missing                    | 31 (43.7)                            | 10 (28.6)                             | 1.32 (0.43-4.06)             | 0.624        |
| <b>Men, n=103</b>          |                                      |                                       |                              |              |
| Positioning                |                                      |                                       |                              |              |
| n-TP                       | 38 (64.4)                            | 20 (45.4)                             | 1                            |              |
| TP                         | 21 (35.6)                            | 24 (54.6)                             | <b>2.34 (1.02-5.33)</b>      | <b>0.043</b> |
| Collateral vessel network  |                                      |                                       |                              |              |
| "Poor"                     | 24 (40.7)                            | 18 (40.9)                             | 1                            |              |
| "Good"                     | 35 (59.3)                            | 26 (59.1)                             | 1.09 (0.47-2.51)             | 0.834        |
| Thrombolysis with IV rt-PA |                                      |                                       |                              |              |
| No                         | 25 (42.4)                            | 18 (40.9)                             | 1                            |              |
| Yes                        | 34 (57.6)                            | 26 (59.1)                             | 0.97 (0.41-2.25)             | 0.937        |
| Recanalization             |                                      |                                       |                              |              |
| Non effective              | 24 (40.7)                            | 12 (27.3)                             | 1                            |              |
| Effective                  | 18 (30.5)                            | 14 (31.8)                             | 1.52 (0.54-4.25)             | <b>0.036</b> |
| Missing                    | 17 (28.8)                            | 18 (40.9)                             | 2.36 (0.87-6.36)             | 0.090        |

TP: Trendelenburg Positioning ; nTP: non-Trendelenburg Positioning

NIHSS: National Institute of Health Stroke Scale

IV rt-PA : intravenous recombinant tissue plasminogen activator

Data are numbers and percentages (brackets), adjusted odds ratios and 95% confidence intervals

**Table S4. Bivariable analysis of the distribution of matching criteria of the propensity score**

|                                   | TP           | n-TP         | <i>P-values</i> |
|-----------------------------------|--------------|--------------|-----------------|
| Total n=203                       | 90 (44.3%)   | 113 (55.6%)  |                 |
| <b>Matching criteria</b>          |              |              |                 |
| <b>Age</b>                        |              |              |                 |
| years, mean ± SD                  | 71.6 ± 16.0  | 73.9 ± 13.1  | 0.607           |
| 31 to 65 years                    | 27 (30.0)    | 28 (24.8)    |                 |
| 66 to 75 years                    | 18 (20.0)    | 28 (24.8)    |                 |
| 76 to 85 years                    | 24 (26.7)    | 37 (32.7)    |                 |
| 86 to 94 years                    | 21 (23.3)    | 20 (17.7)    | 0.491           |
| <b>Gender</b>                     |              |              |                 |
| Female                            | 45 (50.0)    | 38 (33.6)    |                 |
| Male                              | 45 (50.0)    | 75 (66.4)    | 0.349           |
| <b>Blood hypertension</b>         |              |              |                 |
| No                                | 36 (40.0)    | 61 (54.0)    |                 |
| Yes                               | 54 (60.0)    | 52 (46.0)    | 0.573           |
| <b>Diabetes mellitus</b>          |              |              |                 |
| No                                | 79 (87.8)    | 93 (82.3)    |                 |
| Yes                               | 11 (12.2)    | 20 (17.0)    | 0.281           |
| <b>Chronic heart failure</b>      |              |              |                 |
| No                                | 75 (83.3)    | 90 (79.6)    |                 |
| Yes                               | 15 (16.7)    | 23 (20.3)    | 0.503           |
| <b>Atrial fibrillation</b>        |              |              |                 |
| No                                | 60 (66.7)    | 66 (58.4)    |                 |
| Yes                               | 30 (33.3)    | 47 (41.6)    | 0.228           |
| <b>Admission NIHSS score</b>      |              |              |                 |
| points, mean ± SD                 | 13.29 ± 7.27 | 11.89 ± 7.39 | 0.186           |
| <b>Pre-stroke mRS</b>             |              |              |                 |
| points, mean ± SD                 | 0.83 ± 1.11  | 0.70 ± 0.99  | 0.409           |
| <b>Heart rate</b>                 |              |              |                 |
| ppm, mean ± SD                    | 79.5 ± 19.3  | 79.5 ± 16.3  | 0.678           |
| 43 to 70 ppm                      | 33 (36.7)    | 39 (34.5)    | 0.750           |
| 71 to 140 ppm                     | 57 (63.3)    | 74 (65.5)    |                 |
| <b>Mean arterial BP</b>           |              |              |                 |
| mmHg mean ± SD                    | 105.7 ± 18.0 | 106.8 ± 18.6 | 0.305           |
| 59 to 103 mmHg                    | 49 (54.4)    | 48 (42.5)    | 0.090           |
| 104 to 180 mmHg                   | 41 (45.6)    | 65 (57.5)    |                 |
| <b>Haemoglobine rate</b>          |              |              |                 |
| g.dL <sup>-1</sup> mean ± SD      | 13.9 ± 1.8   | 13.8 ± 1.7   | 0.746           |
| 8.7 to 14.0 g.dL <sup>-1</sup>    | 45 (50.0)    | 60 (53.1)    | 0.661           |
| 14.1 to 18.6 g.dL <sup>-1</sup>   | 45 (50.0)    | 53 (46.9)    |                 |
| <b>Collateral vessel network</b>  |              |              |                 |
| "Poor"                            | 34 (37.8)    | 39 (34.5)    |                 |
| "Good"                            | 56 (62.2)    | 74 (65.5)    | 0.630           |
| <b>Thrombolysis with IV rt-PA</b> |              |              |                 |
| No                                | 41 (45.6)    | 52 (46.0)    |                 |
| Yes                               | 49 (54.4)    | 61 (54.0)    | 0.948           |
| <b>Recanalization</b>             |              |              |                 |
| Non effective                     | 33 (36.7)    | 39 (34.5)    |                 |
| Effective                         | 29 (32.2)    | 29 (25.7)    |                 |
| Missing                           | 28 (31.1)    | 45 (39.8)    | 0.391           |
| <b>Length of stay</b>             |              |              |                 |
| days, mean ± SD                   | 11.28 ± 1.07 | 11.29 ± 1.02 | 0.182           |

TP: Trendelenburg Positioning ; nTP: non-Trendelenburg Positioning

NIHSS: National Institute of Health Stroke Scale

BP: blood pressure ; IV rt-PA : intravenous recombinant tissue plasminogen activator

The matching was performed using Mahalanobis distance method and yielded to 99 pairs

Data are numbers and percentages (brackets) or means and standard deviations

**Table S5. Odds ratios for Trendelenburg positioning in subgroup analyses of early National Institute of Health Stroke Scale improvement (non TP group as reference)**

|                               |                                 | TP        | nTP       |              | Adjusted Odds Ratios (95%CI)                  |                          | P- values    |
|-------------------------------|---------------------------------|-----------|-----------|--------------|-----------------------------------------------|--------------------------|--------------|
| Total N=209                   |                                 | n=90      | n=119     | P- values    | associated with TP for delta NIHSS score >= 4 |                          |              |
| Mean arterial BP at admission |                                 |           |           |              |                                               |                          |              |
|                               | 59 to 103 mmHg                  | 4.1 ± 5.8 | 2.9 ± 6.9 | 0.413        | Model 1                                       | 1.24 (0.54-2.81)         | 0.604        |
|                               | 104 to 180 mmHg                 | 3.9 ± 5.6 | 1.0 ± 5.0 | <b>0.015</b> |                                               | <b>2.55 (1.07-6.05)</b>  | <b>0.034</b> |
| Haemoglobine rate             |                                 |           |           |              |                                               |                          |              |
|                               | 8.7 to 14.0 g.dL <sup>-1</sup>  | 3.1 ± 5.4 | 1.2 ± 6.9 | 0.100        | Model 2                                       | 1.44 (0.61-3.37)         | 0.401        |
|                               | 14.1 to 18.6 g.dL <sup>-1</sup> | 3.9 ± 5.6 | 2.5 ± 4.7 | <b>0.045</b> |                                               | 2.36 (0.98-5.65)         | 0.054        |
| Collateral vessel network     |                                 |           |           |              |                                               |                          |              |
|                               | "Poor"                          | 4.0 ± 6.9 | 1.5 ± 6.7 | 0.273        | Model 3                                       | 1.39 (0.52-3.68)         | 0.507        |
|                               | "Good"                          | 4.0 ± 4.9 | 2.0 ± 5.5 | <b>0.012</b> |                                               | <b>2.60 (1.05-6.44)</b>  | <b>0.039</b> |
| Thrombolysis with IV rt-PA    |                                 |           |           |              |                                               |                          |              |
|                               | Yes                             | 4.3 ± 6.6 | 2.9 ± 6.6 | 0.253        | Model 4                                       | 1.62 (0.73-3.56)         | 0.231        |
|                               | No                              | 3.6 ± 4.4 | 0.7 ± 5.0 | <b>0.010</b> |                                               | 2.05 (0.81-5.17)         | 0.129        |
| Recanalization                |                                 |           |           |              |                                               |                          |              |
|                               | Non effective                   | 2.7 ± 6.1 | 0.3 ± 5.0 | 0.076        | Model 5                                       | 2.46 (0.73-8.22)         | 0.143        |
|                               | Effective                       | 5.3 ± 5.2 | 4.4 ± 6.7 | 0.479        |                                               | <b>7.47 (1.29-43.18)</b> | <b>0.025</b> |
|                               | Missing                         | 4.1 ± 5.6 | 1.5 ± 5.7 | 0.109        |                                               | 1.58 (0.47-5.23)         | 0.452        |

TP: Trendelenburg Positioning ; nTP: non-Trendelenburg Positioning

NIHSS: National Institute of Health Stroke Scale

BP: blood pressure ; IV rt-PA : intravenous recombinant tissue plasminogen activator

Model 1 is adjusted for head positioning and recanalization

Model 2 is adjusted for head positioning and recanalization

Model 3 is adjusted for head positioning, mean arterial blood pressure, haemoglobine rate and recanalization

Model 4 is adjusted for head positioning, haemoglobine rate and recanalization

Model 5 is adjusted for head positioning, age, gender, haemoglobine rate and blood pressure

For each stratum, reference categories associated with the n-TP group are hidden in the model

Data are means and standard deviations, adjusted odds ratios and 95% confidence intervals
